# Supplementary material for: Dynamic FMR1 granule phase switch instructed by m6A modification contributes to maternal RNA decay
Source: PubMed Central journal article supplement (PMC8844045; doi:10.1038/s41467-022-28547-7), 2022-02-14
Supplement: 41467_2022_28547_MOESM3_ESM.pdf [file 41467_2022_28547_MOESM3_ESM.pdf]

## Description of Additional Supplementary Files

File Name: Supplementary Data 1

Description: Expression profile of clustered gene groups by RNA sequencing. Table contains degraded maternal mRNAs, stable maternal mRNAs and zygotically expressed mRNAs.

File Name: Supplementary Data 2

Description: Differential gene expression analysis. Table lists differentially expressed genes in *mettl3-14*<sup>(M-,Z+)</sup> and *fmr1*<sup>(M-,Z+)</sup>.

File Name: Supplementary Data 3

Description: The m6A datasets of embryos at the 0–1-hour and 5–6-hour stages.

File Name: Supplementary Data 4

Description: Proteomics Data. Table lists the mass spectrometry proteomics data generated in this study.
